# Supplementary material for: Selecting postoperative adjuvant systemic therapy for early stage breast cancer: A critical assessment of commercially available gene expression assays
Source: PubMed Central journal article supplement — J Surg Oncol. 2017 Feb 17;115(6):647–62. doi: 10.1002/jso.24561 (PMC5484338; doi:10.1002/jso.24561), 2017-02-17
Supplement: JSO-115-647-s003.pdf [file JSO-115-647-s003.pdf]

|          |            |         |                         |      |                                      |               |                                                                                     |      |      |     |          |          |                      |                                                                                                                                                                                                                         |                                                                                                                                                                                                                                                                                                                                                                                                                                    |      |      |            |      |      |          |   |                                                                                                                                                                                                                       |
|----------|------------|---------|-------------------------|------|--------------------------------------|---------------|-------------------------------------------------------------------------------------|------|------|-----|----------|----------|----------------------|-------------------------------------------------------------------------------------------------------------------------------------------------------------------------------------------------------------------------|------------------------------------------------------------------------------------------------------------------------------------------------------------------------------------------------------------------------------------------------------------------------------------------------------------------------------------------------------------------------------------------------------------------------------------|------|------|------------|------|------|----------|---|-----------------------------------------------------------------------------------------------------------------------------------------------------------------------------------------------------------------------|
| Oncotype | prognosis  | Albain  | Lancet Oncol            | 2010 | Retro-prospective biomarker analysis | FFPE archived | SWOG-8814 (ER+, LN-, post-menopausal, tam vs CA-1)                                  | 927  | 367  | yes | Adjuvant | ETx, CTx | DFS/OS at 10 years   | DFS Entire Period HR=2.64(1.33-5.27) p<0.006<br>DFS at 5 Yrs HR=5.5(2.32-12.28) p<0.0002<br>DFS vs ETx vs ET+CTx<br>RS<18 log rank p=0.97 HR=1.02<br>RS 18-30 log rank p=0.48 HR=0.72<br>RS>30 log rank p=0.033 HR=0.95 | OS Entire Period HR=4.4(2.1-9.97) p<0.0006<br>OS for ETx vs ET+CTx<br>RS<18 log rank p=0.69<br>RS 18-30 log rank p=0.85<br>RS>30 log rank p=0.027                                                                                                                                                                                                                                                                                  | 1.00 | 0.00 | 0.12       | 1.00 | 0.00 | II, IIIa | B | Recurrence Score significantly prognostic for DMFS and OS in ER+ LN- pts treated with tam. No benefit was observed for CTx in low RS patients, but a significant benefit was observed in patients with high RS (>25). |
| Oncotype | prognosis  | Dowsett | J Clin Oncol            | 2010 | Retro-prospective biomarker analysis | FFPE archived | TransATAC (ER+, post-menopausal, treated with anastrozole and/or tamoxifen)         | 4160 | 1231 | yes | Adjuvant | ETx      | DR at 9 years        | DR 50 point chg HR=3.92 (95% CI 2.08-7.39) p<0.001<br>Chg in Likelihood Ratio=13.5                                                                                                                                      | DR for 50 pt chg in the LN+ population HR=4.47 (95%CI 1.64-7.88); P=0.002                                                                                                                                                                                                                                                                                                                                                          | 1.00 | 0.00 |            | 0.71 | 0.25 | I, II    | B | RS significantly prognostic for DRFS in both LN- and LN+ treated with tam or anastrozole. No interaction with treatment group. RS is significantly prognostic beyond Adjuvant! Online.                                |
| Oncotype | prognosis  | Paik    | N Engl J Med            | 2004 | Retro-prospective biomarker analysis | FFPE archived | NSABP B-14 (ER+, LN-, tam treated)                                                  | 2617 | 675  | yes | Adjuvant | ETx      | DMFS at 10 years     | Difference in risk of recurrence between low and high groups at 10 years:<br>Low=6.8%(4.0-9.6)<br>Int=14.3%(8.1-20.3)<br>High=30.5%(23.6-37.4)<br>p<0.001                                                               | Multivariate Cox model for risk of distant recurrence compared to age, tumor size, grade, HER2, ER, RS HR=2.81(1.70-4.64) p<0.001                                                                                                                                                                                                                                                                                                  | 1.00 | 0.00 | 0.08       | 0.00 | 1.00 | I, II    | B | Risk of distant recurrence at 10 years significantly different between low and high risk groups. Continuous RS was a significant predictor of both DMFS and OS.                                                       |
| Oncotype | predictive | Paik    | J Clin Oncol            | 2006 | Retro-prospective biomarker analysis | FFPE archived | NSABP B-20 (ER+, LN-, CTx vs no CTx)                                                | 2299 | 670  | yes | Adjuvant | ETx, CTx | DMFS, OS at 10 years | Treatment x continuous RS for DMFS at 10 Yrs. p=0.038                                                                                                                                                                   | KM Est of DMFS at 10 Yrs:<br>Low: Tam 96.8(93.7-99.9); Tam+CTx 95.6(92.7-98.6)<br>Int: Tam 90.9%(82.5-99.4); Tam+CTx 89.1(82.4-95.9)<br>High: Tam 60.5%(46.2-74.8); Tam+CTx 68.1(62.0-74.2)                                                                                                                                                                                                                                        | 1.00 | 0.00 | Not Stated | 0.00 | 1.00 | I, II    | B | Interaction of RS by treatment was significant for ETx compared to ETx plus CTx, with patients with RS >30 deriving benefit from CTx, while patients with low RS tumors <18 derived no benefit.                       |
| PAM50    | predictive | Cheang  | Clin Cancer Res         | 2012 | Retro-prospective biomarker analysis | FFPE archived | NCIC.CTSG MA.5 (pre-menopausal, CMF vs CE)                                          | 716  | 476  | yes | Adjuvant | CTx      | RFS, OS              | ROR-5 risk categories (RS) at 5 Yrs:<br>low=7.5% (94%)<br>moderate=59% (80%)<br>high=51% (53%)<br>log rank p<0.0001                                                                                                     | Multivariate Cox model for RFS (OS) for CE/DMF:<br>HER2 HR=5.6(3.4-9.3) (0.42(0.16-1.0))<br>Basal HR=1.12(0.60-2.08) (1.32(0.71-2.46))<br>LumB HR=0.76(0.47-1.24) (0.83(0.46-1.50))<br>LumA HR=1.14(0.70-1.88) (1.21(0.51-3.27))                                                                                                                                                                                                   | 0.66 | 0.34 | 0.20       | 1.00 | 0.00 | II, IIIa | D | ROR-based intrinsic subtypes were significantly prognostic for RFS and OS.                                                                                                                                            |
| PAM50    | prognosis  | Chia    | Clin Cancer Res         | 2012 | Retro-prospective biomarker analysis | FFPE archived | MA.12: Stage I-III tumors                                                           | 672  | 398  | yes | Adjuvant | ETx, CTx | DFS at 12 years      | Multivariate Cox model for DFS (OS) at 5 Yrs:<br>Basal vs LumA HR=1.5(1.0-2.2) (2.1(0.91-5.20))<br>HER2 vs LumA HR=2.2(1.29-3.80) (2.7(1.18-6.40))<br>LumB vs LumA HR=1.9(1.16-3.39) (2.4(1.25-4.63))<br>p<0.02         | KM of DFS at 12 Yrs for Tam vs Placebo:<br>Tam=86.1%<br>Placebo=74.3%<br>HR=0.52(0.32-0.89) p<0.009                                                                                                                                                                                                                                                                                                                                | 0.75 | 0.11 | 0.07       | 0.75 | 0.25 | I, IIIa  | B | Classification into intrinsic subtypes by the PAM50 assay was prognostic for both disease-free survival (DFS; P=0.0003) and overall survival (OS; P=0.0002). Test methodology was research PCR versus commercial.     |
| PAM50    | prognosis  | Dowsett | J Clin Oncol            | 2013 | Retro-prospective biomarker analysis | FFPE archived | TransATAC (ER+, post-menopausal, treated with anastrozole and/or tamoxifen)         | 2006 | 940  | yes | Adjuvant | ETx      | DR at 10 years       | Chg in Likelihood ratio for DRFS:<br>All Pts ROR*+CTS vs CTS=34.3 p<0.001<br>LN- ROR*+CTS vs CTS=23.7 p<0.001<br>LN+ ROR*+CTS vs CTS=24.8 p<0.001<br>HER2, LN- ROR*+CTS vs CTS=23.4 p<0.001                             | Chg in Likelihood ratio for DRFS:<br>All Pts ROR*+CTS vs CTS=34.3 p<0.001<br>LN- ROR*+CTS vs CTS=23.7 p<0.001<br>LN+ ROR*+CTS vs CTS=24.8 p<0.001<br>HER2, LN- ROR*+CTS vs CTS=23.4 p<0.001                                                                                                                                                                                                                                        | 1.00 | 0.00 | 0.64       | 0.27 | 0.73 | I, II    | B | Continuous ROR is prognostic added significant prognostic information beyond clinical factors in all patients. ROR risk groups prognostic for DR out to 10 years.                                                     |
| PAM50    | prognosis  | Gnant   | Ann Oncol               | 2014 | Retro-prospective biomarker analysis | FFPE archived | ABCSGB (ER+ ESBC treated with tam)                                                  | 3901 | 1478 | yes | Adjuvant | ETx      | DRFS at 10 years     | Chg in likelihood ratio for DRFS at 10 Yrs:<br>All Pts ROR*+CLP vs CLP=5.69 p<0.0001<br>LN-, HER2- ROR*+CLP vs CLP=21.69 p<0.0001<br>LN+, HER2- ROR*+CLP vs CLP=27.65 p<0.0001                                          | All Pts. KM est of survival of DRFS to 10 Yrs:<br>Low=96.7%(94.6-98.0)<br>Int=91.3%(88.1-93.8)<br>High=79.9%(75.7-83.9)                                                                                                                                                                                                                                                                                                            | 1.00 | 0.00 | 0.95       | 0.39 | 0.71 | I, II    | B | Both continuous ROR score and ROR-based risk groups add prognostic information for 10 year DRFS above standard clinical factors for all subgroups except HER2-.                                                       |
| PAM50    | prognosis  | Gnant   | Ann Oncol               | 2015 | Retro-prospective biomarker analysis | FFPE archived | ABCSGB, TransATAC (ER+, post-menopausal, treated with anastrozole and/or tamoxifen) | 9598 | 2197 | yes | Adjuvant | ETx      | DR at 10 years       | Cont ROR Chg in likelihood ratio for DR at 10 Yrs:<br>N1 ROR*+CTS vs CTS=17.53 p<0.0001<br>N2-3 ROR*+CTS vs CTS=14.16 p<0.0002<br>LN- ROR*+CTS vs CTS=45.18 p<0.0001<br>N1-3 ROR*+CTS vs CTS=32.45 p<0.0001             | ROR Risk Grps Chg in likelihood ratio for DR at 10 Yrs:<br>N1 ROR*+CTS vs CTS=11.32 p<0.0035<br>N2-3 ROR*+CTS vs CTS=13.15 p<0.0014<br>LN- ROR*+CTS vs CTS=32.19 p<0.0001<br>N1-3 ROR*+CTS vs CTS=21.05 p<0.0001<br>IS Risk Grps Chg in likelihood ratio for DR at 10 Yrs:<br>N1 ROR*+CTS vs CTS=12.16 p<0.0005<br>N2-3 ROR*+CTS vs CTS=8.58 p<0.0034<br>LN- ROR*+CTS vs CTS=26.10 p<0.0001<br>N1-3 ROR*+CTS vs CTS=20.48 p<0.0001 | 1.00 | 0.00 | Not Stated | 0.25 | 0.75 | I, III   | B | PAM 50 ROR, risk groups, and intrinsic subtypes add prognostic information to clinical information for node positive pts.                                                                                             |
| PAM50    | prognosis  | Liu     | Breast Cancer Res Treat | 2015 | Retro-prospective biomarker analysis | FFPE archived | MA.21 (pre-menopausal, high-risk LN- or LN+ (AC1 vs CE) vs EC1)                     | 2104 | 1094 | yes | Adjuvant | CTx      | RFS at 12 years      | Univariate RFS for categorical ROR: HR=1.27(0.83-1.95) p=0.28<br>Multivariate RFS for categorical ROR: HR=1.98(0.93-7.45) p=0.311                                                                                       | Multivariate Cox model for RFS:<br>LumB vs LumA HR=1.48(0.92-2.37) p=0.106<br>HER2 vs LumA HR=2.08(1.60-4.48) p<0.001<br>Basal vs LumA HR=1.07(0.63-1.83) p=0.802                                                                                                                                                                                                                                                                  | 0.58 | 0.42 | 0.12       | 0.70 | 0.30 | II, IIIa | B | Continuous ROR was significantly associated with RFS; categorical ROR was neither predictive nor prognostic for RFS.                                                                                                  |
