# Supplementary figures and images for: Selecting postoperative adjuvant systemic therapy for early stage breast cancer: A critical assessment of commercially available gene expression assays
Source: PubMed Central journal article supplement — J Surg Oncol. 2017 Feb 17;115(6):647–62. doi: 10.1002/jso.24561 (PMC5484338; doi:10.1002/jso.24561), 2017-02-17

Figure S1: PRISMA Flow Chart

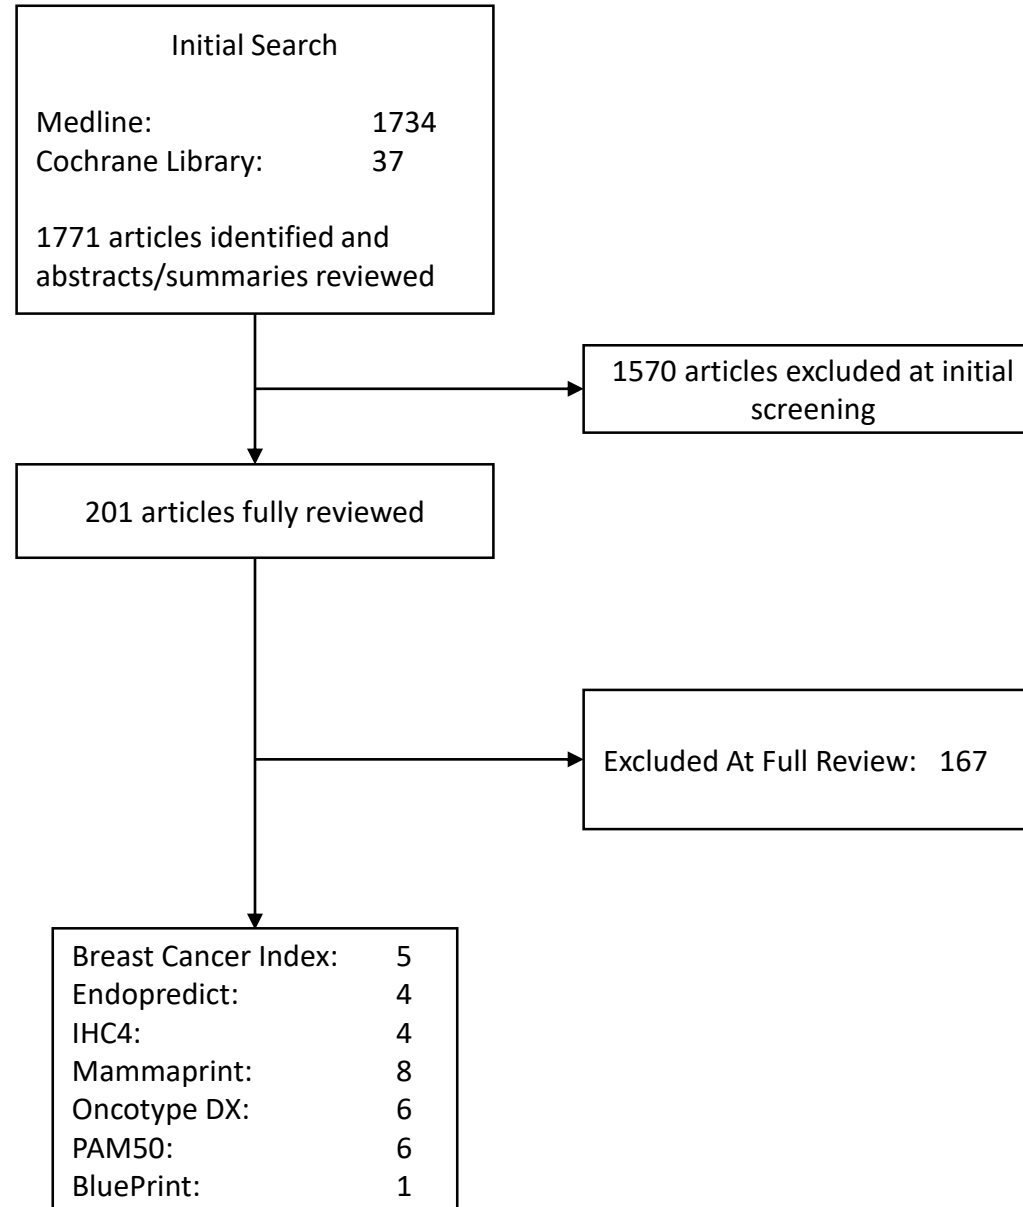

Supplement: JSO-115-647-s001.pdf [file JSO-115-647-s001.pdf]
